# Supplementary material for: [(η2-(Si/Ge)4)Zn(η2-(Si/Ge)4)]6− – novel Zintl clusters with mixed Si/Ge tetrahedra bridged by a Zn atom
Source: Royal Society of Chemistry journal article supplement (doi:10.1039/c2cc33652a), 2012-01-01
Supplement: c2cc33652a.pdf [file c2cc33652a.pdf]

## Supporting Information

for

### $[(\eta^2-(\text{Si/Ge})_4)\text{Zn}(\eta^2-(\text{Si/Ge})_4)]^{6-}$ - Novel Zintl Clusters with Mixed Si/Ge Tetrahedra bridged by a Zn Atom

**Markus Waibel, Thomas Henneberger, Laura-Alice Jantke, and Thomas F. Fässler\***

#### **Experimental Details:**

All manipulations were carried out under argon atmosphere using standard Schlenk and glovebox techniques.  $\text{Ph}_2\text{Zn}$  (Ph = phenyl, 99%, ABCR) was used as received. [18]-crown-6 was sublimated under dynamic vacuum at 80 °C. [2.2.2]crypt was dried *in vacuo*. Liquid ammonia was dried and stored over sodium metal. Si powder (99.9999%, AlfaAesar) and Ge pieces (99.999%, Chempur) were used as received, K was purified by liquating.

X-ray powder diffraction: Phase analyses of  $\text{K}_{12}\text{Si}_{12}\text{Ge}_5$  was performed using a Stoe STADI P diffractometer (Ge(111) monochromator;  $\text{Cu}_{\text{K}\alpha 1}$  radiation) equipped with a linear position-sensitive detector. For sample preparation the products were finely ground in an agate mortar, mixed with diamond powder and filled into sealed glass capillaries. The samples were measured in Debye-Scherrer mode ( $2\theta_{\text{max}} = 90^\circ$ ). Data analysis was carried out using the Stoe WinXPOW software package.<sup>1</sup>

Single-crystal structure determination: The thermally very unstable, air- and moisture-sensitive crystals of **1** and **2** were transferred from the reaction mixture into perfluoropolyalkyl ether oil at 213 K under a cold  $\text{N}_2$  stream. The single crystals were fixed on a glass capillary and positioned in a 120 K cold  $\text{N}_2$  stream using the crystal cap system. The data collection was performed at 120(2) K using an Oxford-Diffraction Xcalibur3 diffractometer ( $\text{Mo}_{\text{K}\alpha}$  radiation). Structures were solved by Direct Methods (SHELXS-97)<sup>2</sup> and refined by full-matrix least-squares calculations

against  $F^2$  (SHELXL-97).<sup>3</sup> CCDC-876865 and CCDC-876866 contain the supplementary crystallographic data for compounds **1** and **2**. These data can be obtained free of charge from the Cambridge Crystallographic Data Centre via [www.ccdc.cam.ac.uk/data\\_request/cif](http://www.ccdc.cam.ac.uk/data_request/cif).

EDX analysis of the crystals of **1** and **2** was carried out on a JEOL-SEM 5900LV spectrometer equipped with an Oxford Instruments INCA energy dispersive X-ray microanalysis system.

The ternary Zintl phase  $K_{12}Si_{17-x}Ge_x$  ( $x = 5$ ) was synthesized from a mixture of 6.52 mmol alkali metal and the corresponding molar ratio of a ball milled Si/Ge alloy in sealed tantalum containers. This mixture was heated to 900 °C, held at that temperature for 10 h, and then slowly cooled down to room temperature with a rate of 0.5 K/min.

Compound **1**:  $K_{12}Si_{12}Ge_5$  (88 mg; 0.075 mmol), [2.2.2]crypt (51 mg, 0.135 mmol) and  $Ph_2Zn$  (17 mg; 0.075 mmol) were weighed into a Schlenk tube and dissolved in approximately 1 mL liquid ammonia at -78 °C. The resulting red reaction mixture, still containing an insoluble, not further characterized residue, was kept at -70 °C. **1** crystallized as dark red plates which were isolated after 14 weeks with low yield. Crystal size: 0.15 x 0.15 x 0.1 mm<sup>3</sup>; unit cell parameters:  $a = 9.0694(5)$  Å,  $b = 11.4274(5)$  Å,  $c = 15.8894(8)$  Å,  $\alpha = 77.468(4)$ °,  $\beta = 81.547(4)$ °,  $\gamma = 87.070(4)$ °,  $V = 1589.8(2)$  Å<sup>3</sup>; triclinic, space group  $P\bar{1}$  (No. 2),  $Z = 2$ ,  $\rho_{calc} = 1.794$  g cm<sup>-3</sup>,  $\mu = 4.802$  mm<sup>-1</sup>,  $\theta_{max} = 27.50$ °, 14501 measured reflections, 7193 independent reflections,  $R_{int} = 0.059$ ,  $R_1 = 0.041$  and  $wR_2 = 0.079$  for reflections with  $I \geq 2\sigma(I)$ ,  $R_1 = 0.090$  and  $wR_2 = 0.086$  for all data. EDX analysis confirmed the presence of Zn, Si, Ge and K in single crystals of **1**. Observed ratio for Zn/Si/Ge/K: 6(2)/34(4)/19(5)/41(4) atom-%.

Compound **2**:  $K_{12}Si_{12}Ge_5$  (88 mg; 0.075 mmol), [18]-crown-6 (36 mg, 0.135 mmol) and  $Ph_2Zn$  (17 mg; 0.075 mmol) were weighed into a Schlenk tube and dissolved in approximately 1 mL liquid ammonia at -78 °C. The resulting red solution, still containing an insoluble, not further characterized residue, was kept at -70 °C. **2** crystallized as red plates which were isolated after 16 weeks with low yield. Crystal size: 0.2 x 0.15 x 0.1 mm<sup>3</sup>; unit cell parameters:  $a = 9.5430(3)$  Å,  $b = 12.2351(4)$  Å,  $c = 13.8927(4)$  Å,  $\beta = 103.145(3)$ °,  $V = 1579.60(8)$  Å<sup>3</sup>; monoclinic, space group  $P2_1$  (No. 4),  $Z = 2$ ,  $\rho_{calc} = 1.858$  g cm<sup>-3</sup>,  $\mu = 5.334$  mm<sup>-1</sup>,  $\theta_{max} = 26.25$ °, 12970 measured reflections, 5149 independent reflections,  $R_{int} = 0.055$ ,  $R_1 = 0.036$  and  $wR_2 = 0.075$  for reflections with  $I \geq 2\sigma(I)$ ,  $R_1 = 0.066$  and  $wR_2 = 0.079$  for all data.  $BASF = 0.55(3)$ . EDX analysis confirmed the presence of Zn, Si, Ge and K in single crystals of **2**. Observed ratio for Zn/Si/Ge/K: 7(2)/44(5)/6(2)/43(5) atom-%.

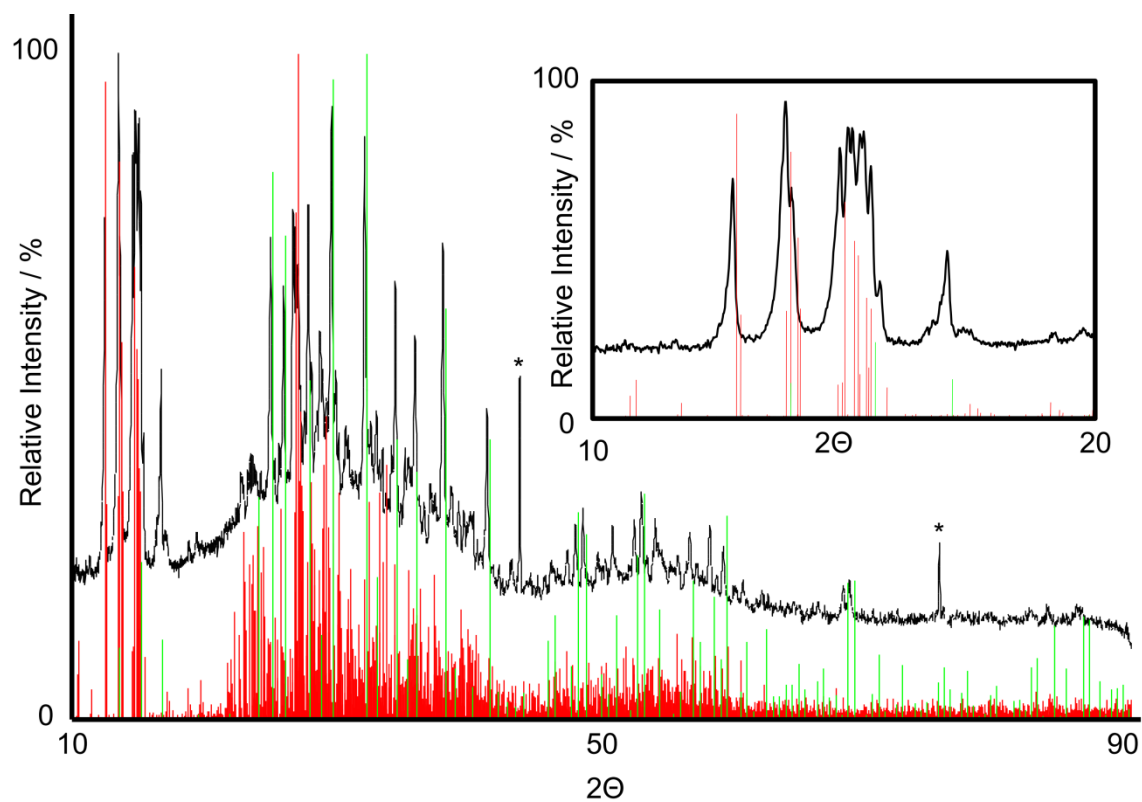

**Figure S1:** X-ray powder diagram of  $K_{12}Si_{12}Ge_5$  ( $2\theta = 10 - 90^\circ$ ) with the smaller picture showing an enlarged section ( $2\theta = 10 - 20^\circ$ ). Theoretical powder diagram of  $K_{12}Si_{17}$  colored in red. The theoretical diagram for  $KSi$  is colored in green. The reflections resulting from the diamond powder are marked with \*.

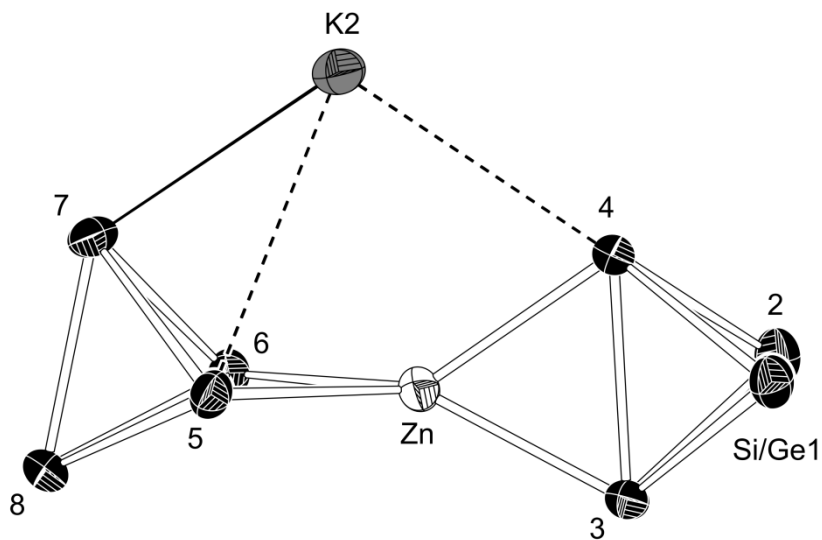

**Figure S2:** Structure of the novel dimeric tetrahedral Zintl cluster  $[(\eta^2-E_4)Zn(\eta^2-E_4)]^{6-}$  (**1a**). Displacement ellipsoids are drawn at the 70% probability level. Si amounts at atomic sites *E* in % (standard deviation): *E*1 37.9(4), *E*2 39.5(4), *E*3 78.5(4), *E*4 72.8(4), *E*5 68.3(4), *E*6 82.4(4), *E*7 53.9(4), *E*8 36.9(4). Selected bond lengths / Å: *E*1 - *E*2 = 2.564(1), *E*1 - *E*3 = 2.471(2), *E*1 - *E*4 = 2.457(1), *E*2 - *E*3 = 2.452(1), *E*2 - *E*4 = 2.471(1), *E*3 - *E*4 = 2.621(2), Zn - *E*3 = 2.509(1), Zn - *E*4 = 2.535(1), Zn - *E*5 = 2.545(1), Zn - *E*6 = 2.468(1), *E*5 - *E*6 = 2.640(2), *E*5 - *E*7 = 2.459(1), *E*5 - *E*8 = 2.483(1), *E*7 - *E*8 = 2.549(1), *E*6 - *E*7 = 2.450(2), *E*6 - *E*8 = 2.449(1), K2 - *E*7 = 3.292(2). K - *E* distances longer than 3.4 Å are shown as dotted lines.

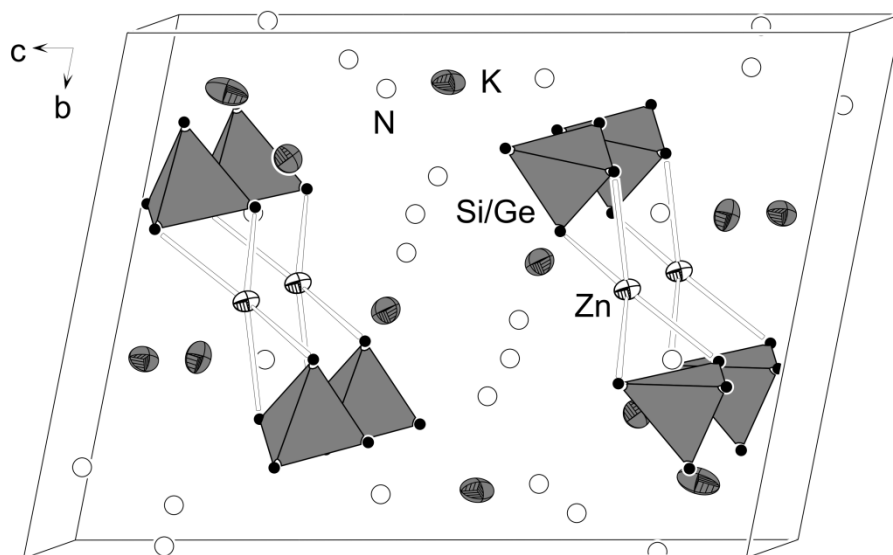

**Figure S3a:** Unit cell of **1** (triclinic space group  $P\bar{1}$ ; view along the crystallographic [100] direction). Heteroatomic tetrahedra are shown as grey polyhedra, K and Zn atoms are shown as ellipsoids with 70 % probability. Ammonia molecules are schematically shown for clarity.

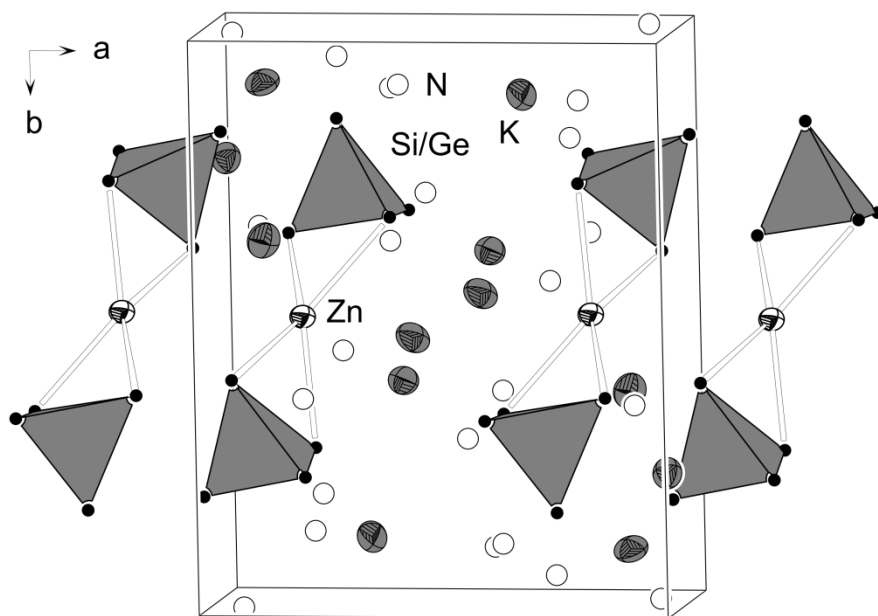

**Figure S3b:** Unit cell of **1** (triclinic space group  $P\bar{1}$ ; view along the crystallographic [001] direction). Heteroatomic tetrahedra are shown as grey polyhedra, K and Zn atoms are shown as ellipsoids with 70 % probability. Ammonia molecules are schematically shown for clarity.

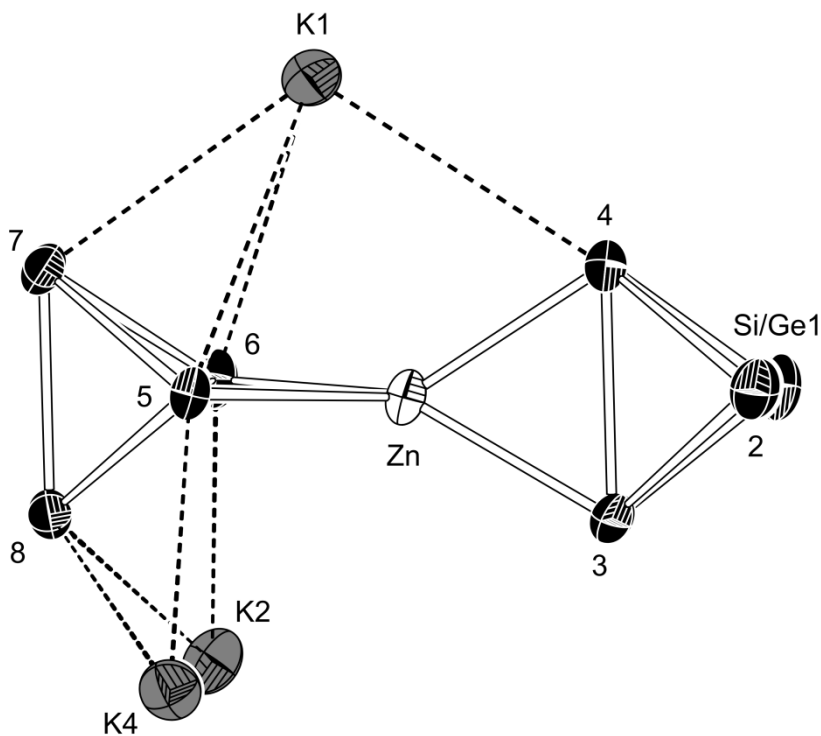

**Figure S4:** Structure of the novel dimeric tetrahedral Zintl cluster  $[(\eta^2-E_4)Zn(\eta^2-E_4)]^{6-}$  (**2a**). Displacement ellipsoids are drawn at the 70% probability level. Si amounts at atomic sites *E* in % (standard deviation): *E1* 30.5(9), *E2* 32.9(9), *E3* 63.6(5), *E4* 71.8(5), *E5* 70.8(8), *E6* 75.1(8), *E7* 38.2(5), *E8* 31.9(5). Selected bond lengths / Å: *E1* - *E2* = 2.549(1), *E1* - *E3* = 2.481(3), *E1* - *E4* = 2.467(3), *E2* - *E3* = 2.465(3), *E2* - *E4* = 2.478(2), *E3* - *E4* = 2.639(2), Zn - *E3* = 2.510(1), Zn - *E4* = 2.511(2), Zn - *E5* = 2.494(3), Zn - *E6* = 2.516(3), *E5* - *E6* = 2.622(2), *E5* - *E7* = 2.457(3), *E5* - *E8* = 2.475(3), *E7* - *E8* = 2.572(1), *E6* - *E7* = 2.449(3), *E6* - *E8* = 2.484(3). K - *E* distances longer than 3.4 Å are shown as dotted lines.

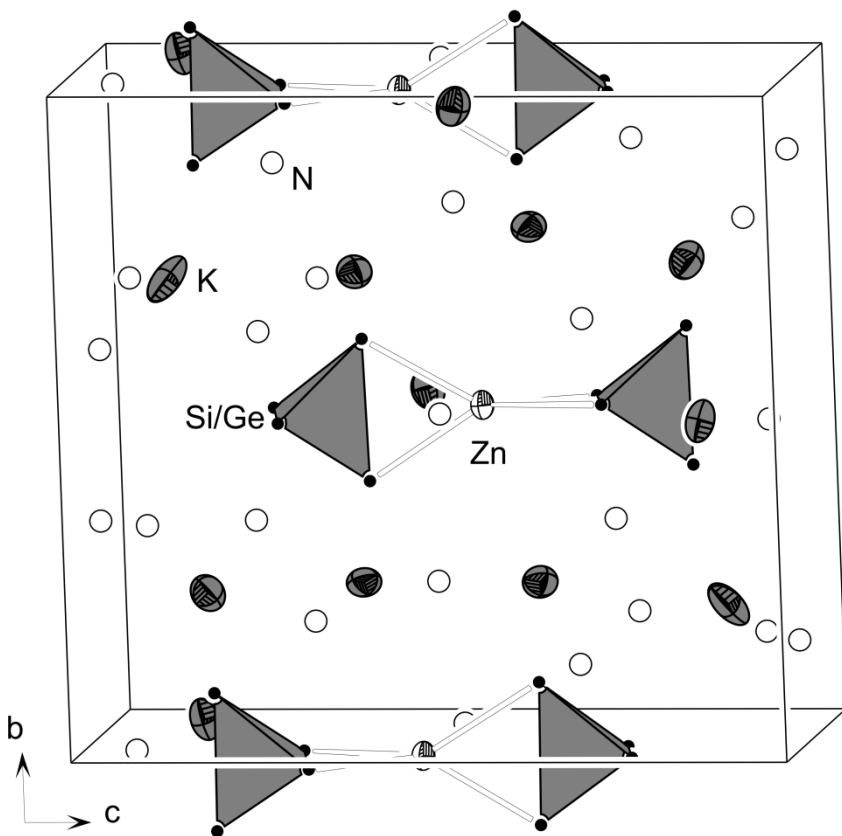

**Figure S5:** Unit cell of **2** (monoclinic space group  $P2_1$ ; view along the crystallographic [100] direction). Heteroatomic tetrahedra are shown as grey polyhedra, K and Zn atoms are shown as ellipsoids with 70 % probability. Ammonia molecules are schematically shown for clarity.

### Computational Details:

DFT-calculations on  $[\text{Si}_4]^{4-}$ ,  $[\text{Si}_2\text{Ge}_2]^{4-}$  and  $[\text{Ge}_4]^{4-}$  were performed in the Gaussian09. program package.<sup>4</sup> For all calculations the exchange correlation hybrid functional after Perdew, Burke, and Ernzerhof (PBE0)<sup>5,6</sup> was used together with triple-zeta-valence + polarization quality basis set (Def2-TZVP).<sup>7</sup> For compensation of the negative cluster charges, a solvation model (Polarizable Continuum Model, PCM) was used. Harmonic vibration frequencies were calculated to characterize the nature of the stationary point on the potential energy surface.

**Table S1:** Comparison of electronic and Gibbs free energy for two possibilities of mixing the clusters according to Scheme S1. The differences of their absolute total energies  $\Delta_E$  and Gibbs free energies  $\Delta_G$  are listed in kJ/mol.

|                                           | $\Delta_E/\text{kJ}\cdot\text{mol}^{-1}$ | $\Delta_G/\text{kJ}\cdot\text{mol}^{-1}$ |
|-------------------------------------------|------------------------------------------|------------------------------------------|
| $[\text{Si}_4]^{4-} + [\text{Ge}_4]^{4-}$ | 1.0                                      | 4.6                                      |
| $2 [\text{Si}_2\text{Ge}_2]^{4-}$         | 0                                        | 0                                        |

**Scheme S1:**



The HOMO-LUMO gap of the mixed cluster  $[\text{Si}_2\text{Ge}_2]^{4-}$  is very close to the  $[\text{Si}_4]^{4-}$  tetrahedron (Table S2). Additionally the difference to  $[\text{Ge}_4]^{4-}$  is very small (range from 4.04 eV to 4.49 eV).

**Table S2:** HOMO-LUMO gaps for the homoatomic and the mixed  $[\text{Si}_2\text{Ge}_2]^{4-}$  tetrahedral clusters formed of Si and Ge, calculated with Gaussian09<sup>4</sup> after structure optimization.

| Compound                        | gap /eV |
|---------------------------------|---------|
| $[\text{Si}_4]^{4-}$            | 4.05    |
| $[\text{Si}_2\text{Ge}_2]^{4-}$ | 4.04    |
| $[\text{Ge}_4]^{4-}$            | 4.29    |

**Table S3:** Comparison of resulting bond lengths in molecular  $[\text{Si}_4]^{4-}$ ,  $[\text{Si}_2\text{Ge}_2]^{4-}$  and  $[\text{Ge}_4]^{4-}$  clusters after their structure optimization with Gaussian09, using the functional PBE0 and def2-TZVP type basis sets for all elements. Bond length differences d are given in percent.

|                                 | $d_{\text{Si-Si}}/\text{Å}$ | $d_{\text{relat.}}$ | $d_{\text{Si-Ge}}/\text{Å}$ | $d_{\text{relat.}}$ | $d_{\text{Ge-Ge}}/\text{Å}$ | $d_{\text{relat.}}$ |
|---------------------------------|-----------------------------|---------------------|-----------------------------|---------------------|-----------------------------|---------------------|
| $[\text{Si}_4]^{4-}$            | 2.429                       | 1                   | –                           | –                   | –                           | –                   |
| $[\text{Si}_2\text{Ge}_2]^{4-}$ | 2.424                       | 1.00                | 2.513                       | 1.04                | 2.569                       | 1.06                |
| $[\text{Ge}_4]^{4-}$            | –                           | –                   | –                           | –                   | 2.580                       | 1.06                |

## Literature:

- (1) WinXPow *Stoe & Cie GmbH, Version 2.08. 2003.*
- (2) Sheldrick, G. M. *SHELXS-97; Program for the Solution of Crystal Structures; Universität Göttingen 1997.*
- (3) Sheldrick, G. M. *SHELXS-97; Program for the Refinement of Crystal Structures; Universität Göttingen 1997.*
- (4) Frisch, M. J.; Trucks, G. W.; Schlegel, H. B.; Scuseria, G. E.; Robb, M. A.; Cheeseman, J. R.; Scalmani, G.; Barone, V.; Mennucci, B.; Petersson, G. A.; Nakatsuji, H.; Caricato, M.; Li, X.; Hratchian, H. P.; Izmaylov, A. F.; Bloino, J.; Zheng, G.; Sonnenberg, J. L.; Hada, M.; Ehara, M.; Toyota, K.; Fukuda, R.; Hasegawa, J.; Ishida, M.; Nakajima, T.; Honda, Y.; Kitao, O.; Nakai, H.; Vreven, T.; Montgomery, J., J. A.; Peralta, J. E.; Ogliaro, F.; Bearpark, M.; Heyd, J. J.; Brothers, E.; Kudin, K. N.; Staroverov, V. N.; Kobayashi, R.; Normand, J.; Raghavachari, K.; Rendell, A.; Burant, J. C.; Iyengar, S. S.; Tomasi, J.; Cossi, M.; Rega, N.; Millam, J. M.; Klene, M.; Knox, J. E.; Cross, J. B.; Bakken, V.; Adamo, C.; Jaramillo, J.; Gomperts, R.; Stratmann, R. E.; Yazyev, O.; Austin, A. J.; Cammi, R.; Pomelli, C.; Ochterski, J. W.; Martin, R. L.; Morokuma, K.; Zakrzewski, V. G.; Voth, G. A.; Salvador, P.; Dannenberg, J. J.; Dapprich, S.; Daniels, A. D.; Farkas, O.; Foresman, J. B.; Ortiz, J. V.; Cioslowski, J.; Fox, D. J. *Gaussian 09, Revision A.02, Gaussian, Inc., Wallingford CT, 2009.*
- (5) Perdew, P.; Burke, K.; Ernzerhof, M. *Phys. Rev. Lett.* **1996**, *77*, 3865.
- (6) Adamo, C.; Barone, V. *J. Chem. Phys.* **1999**, *110*, 6158.
- (7) Weigend, F.; Ahlrichs, R. *Phys. Chem. Chem. Phys.* **2005**, *7*, 3297.
